# Supplementary material for: Coastal primary productivity changes over the last millennium: a case study from the Skagerrak (North Sea)
Source: Copernicus journal article supplement (doi:10.5194/bg-15-5909-2018), 2018-10-08
Supplement: Supplementary file 1 [file bg-15-5909-2018-supplement.pdf]

Supplement of Biogeosciences, 15, 5909–5928, 2018  
<https://doi.org/10.5194/bg-15-5909-2018-supplement>  
© Author(s) 2018. This work is distributed under  
the Creative Commons Attribution 4.0 License.

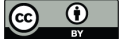

*Supplement of*

## **Coastal primary productivity changes over the last millennium: a case study from the Skagerrak (North Sea)**

**Anna Binczewska et al.**

*Correspondence to:* Anna Binczewska ([anna.binczewska@usz.edu.pl](mailto:anna.binczewska@usz.edu.pl))

The copyright of individual parts of the supplement might differ from the CC BY 4.0 License.

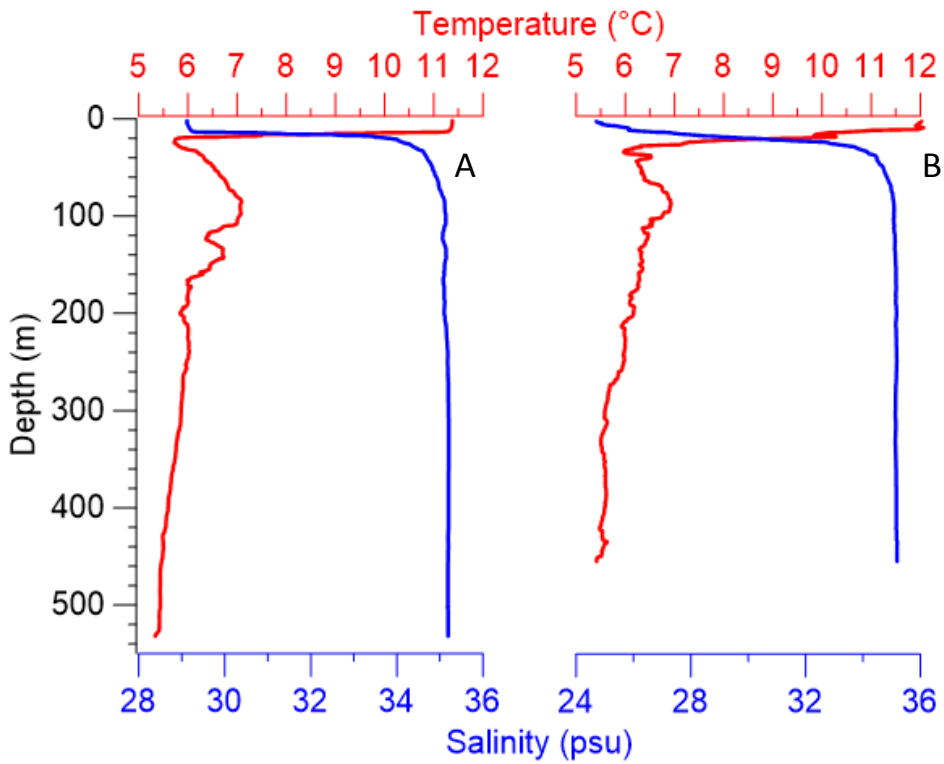

| CTD | Core      | Date       | Latitude (N) | Longitude (E) |
|-----|-----------|------------|--------------|---------------|
| A   | EMB046-20 | 2013-05-29 | 58°31.5903   | 9°29.0907     |
| B   | EMB046-17 | 2013-05-28 | 57°49.7399   | 7°23.7900     |

Figure S1: Temperature (red curve) and salinity (blue curve) from CTD measurements taken from locations close to the studied sites and during a R/V Elisabeth Mann-Borgese cruise in May 2013.
